# Supplementary material
Source: PubMed Central journal article supplement (PMC5637933)
Supplement: HUMU-38-1372-s001.pdf [file HUMU-38-1372-s001.pdf]

## Supplemental Figures and Tables (Chen et al)

### Supplemental Figure 1.

Sanger sequencing chromatograms showing skipping of exons and other aberrant splicing in *PTEN*<sup>1</sup> cDNA resulting from germline intronic variants. Nucleotide numbering uses +1 as the A of ATG translation initiation codon in the reference sequence, with the initiation codon as codon 1. **A:** Exon 3 skipping. **B:** Exon 4 skipping. **C:** Exon 5 skipping. **D:** Exon 6 skipping. **E:** Intron 2 mutation c.165-2A>G creates new splice site using -3 position A and mutant G resulting adding G in 5' end of exon3. **F:** *PTEN* intron 6 mutation c.635-1G>C uses cryptic splice site at r.642\_643 causing mutant transcript missing 8 nucleotides at the 5' end of exon7. **G:** *PTEN* intron 6 mutation c.635-1G>C uses cryptic splice site at r.688\_689 causing mutant transcript missing 54 nucleotides at the 5' end of exon7. **H:** Intron 7 mutations c.802-2A>T and c.802-2A>G use cryptic splice site at r.844\_845 causing mutant transcript missing 43 nucleotides at the 5' end of exon 8.

---

<sup>1</sup> The *PTEN* reference sequence is NC\_000010.11

### A Exon 3 skipping

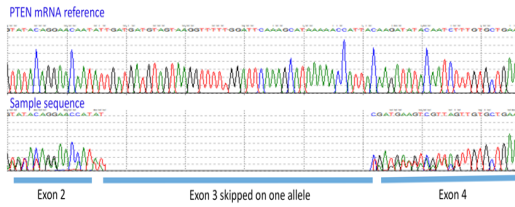

### B Exon 4 skipping

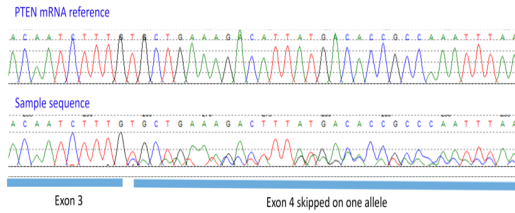

### C Exon 5 skipping

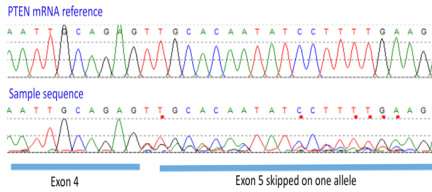

### D Exon 6 skipping

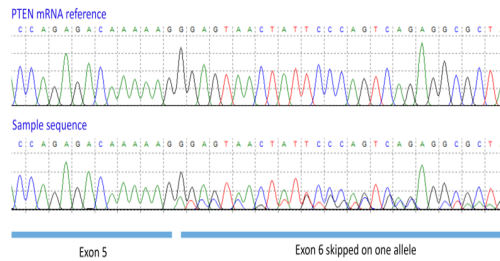

### E c.165-2A>G

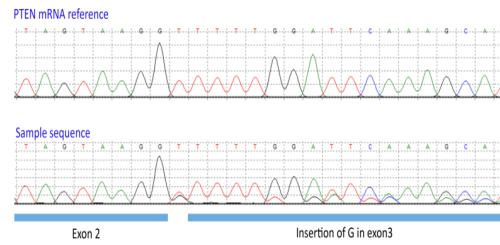

### F r.635\_642del8

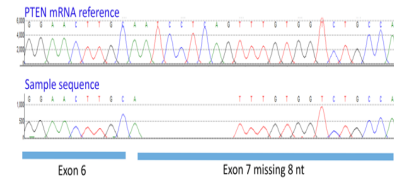

### G r.635\_688del54

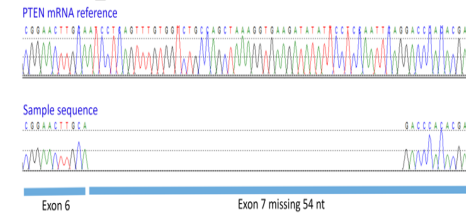

### H r.802\_844del43

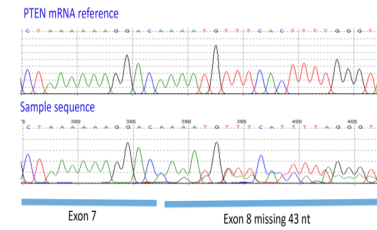

### Supplemental Figure 2.

*PTEN*<sup>2</sup> cDNA sequencing of intron 8 mutations using 3'RACE. **A:** Agarose gel showing the 3'RACE PCR products for the following intron 8 mutations: c.1027-2A>C, c.1026+1G>A, c.1026+1G>C. **B:** Intron 8 mutation c.1027-2A>C results in the mutant transcript premature termination within exon 8 at r.962. Poly (A) is clearly shown. **C:** Intron 8 mutation c. 1026+1G>A results in the mutant transcript with intron 8 retention, extending directly from exon 8 sequence. **D:** Intron 8 mutation c.1026+1G>C results in the mutant transcript with intron 8 retention, extending directly from exon 8 sequence. **E:** RT-PCR using 2 sets of primers with forward primers reside in *PTEN* exon 7 and reverse primers reside in intron 8 retention region as detected in C and D. Agarose gel showing the PCR results from control blood cDNA, HeLa cell cDNA and normal control LBL cDNA. Pooled human genomic DNA (Promega) was used as negative control for genomic DNA contamination of RNA/RT-PCR. Nucleotide numbering uses +1 as the A of ATG translation initiation codon in the reference sequence, with the initiation codon as codon 1.

---

<sup>2</sup> The *PTEN* reference sequence is NC\_000010.11

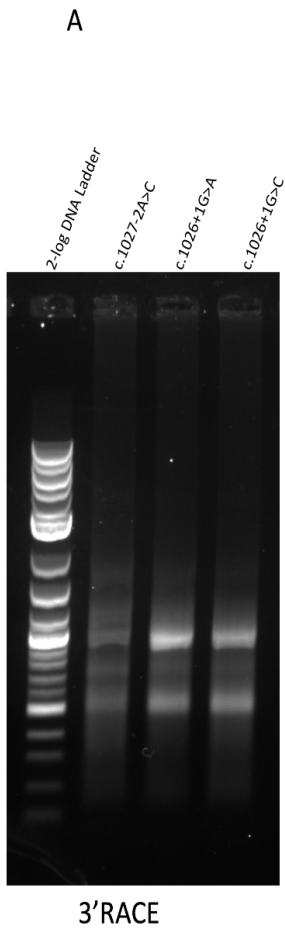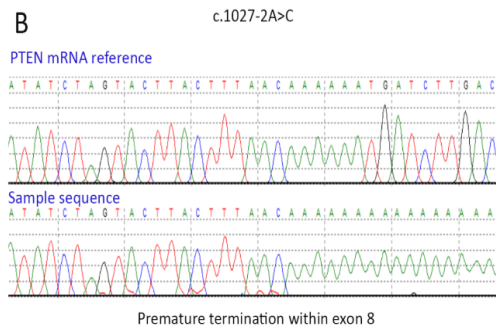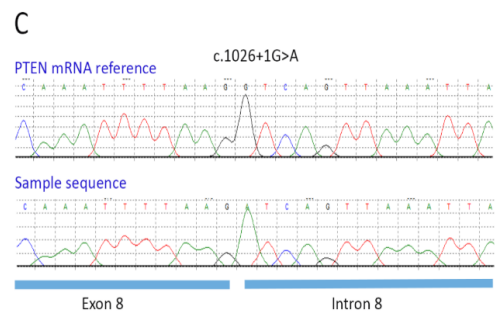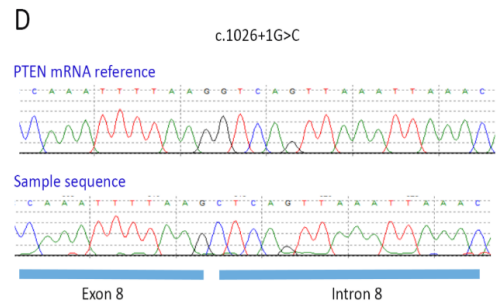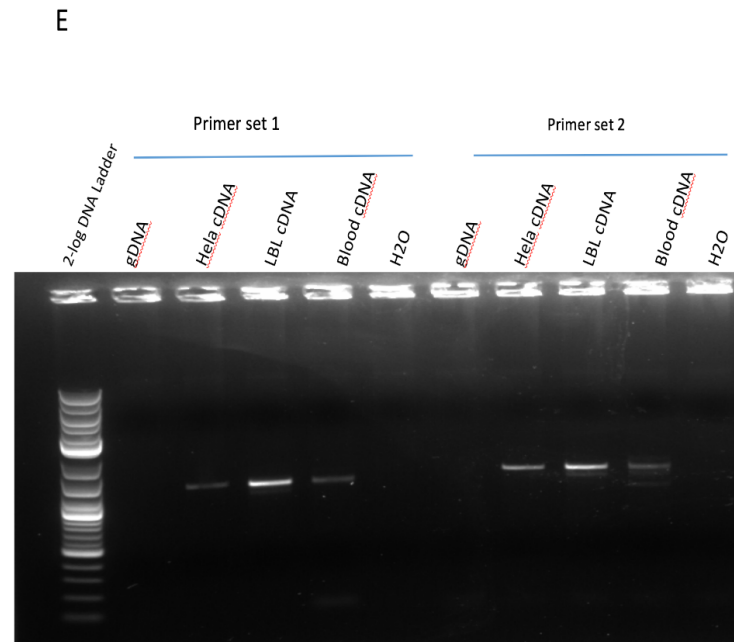

**Supplemental Table 1.**

Germline *PTEN*<sup>3</sup> intronic variants and clinical features from 61 probands and family members included in RNA processing and protein expression analysis

| Patient | Age of Onset | Variation Name       | Intron | CC Score | Macrocephaly | Breast cancer | Thyroid cancer | Endometrial carcinoma | Lhermitte-Duclos disease | Other thyroid lesions | Intellectual disability | Hamartomatous intestinal polyps | Fibrocystic disease of the breast | Lipomas | Fibromas | Genitourinary tumors | Genitourinary malformation | Trichilemmoma | Acral keratoses | Papillomatous lesions | Mucosal lesions | Negative for phenotypes of interest |  |
|---------|--------------|----------------------|--------|----------|--------------|---------------|----------------|-----------------------|--------------------------|-----------------------|-------------------------|---------------------------------|-----------------------------------|---------|----------|----------------------|----------------------------|---------------|-----------------|-----------------------|-----------------|-------------------------------------|--|
| 4       | 48           | c.165-2A>G           | 2      | 8        |              |               |                |                       |                          |                       |                         |                                 |                                   | X       |          | X                    |                            |               |                 |                       |                 |                                     |  |
| 4a      | 52           | c.165-2A>G           | 2      | 10       |              |               |                |                       | X                        |                       |                         |                                 |                                   |         |          |                      |                            |               |                 |                       |                 |                                     |  |
| 5       | 59           | c.165-1G>C           | 2      | NA       | X            |               |                |                       |                          | X                     |                         | X                               |                                   | X       |          |                      |                            |               |                 |                       |                 |                                     |  |
| 6       | 64           | c.210-1G>A           | 3      | 11       | X            |               |                |                       |                          | X                     |                         |                                 |                                   |         |          | X                    |                            |               |                 |                       |                 |                                     |  |
| 7       | 59           | c.210-1G>A           | 3      | 18       | X            | X             |                |                       |                          | X                     |                         |                                 | X                                 |         |          | X                    |                            |               |                 |                       |                 |                                     |  |
| 7a      | 53           | c.210-1G>A           | 3      | 14       | X            |               | X              |                       |                          |                       |                         |                                 |                                   | X       |          |                      |                            | X             |                 |                       |                 |                                     |  |
| 7b      | 19           | c.210-1G>A           | 3      | 26       | X            |               | X              |                       |                          | X                     |                         |                                 |                                   |         |          |                      |                            |               |                 |                       |                 |                                     |  |
| 19      | 63           | c.209+4_209+7delAGTA | 3      | NA       | X            | X             |                |                       | X                        | X                     |                         |                                 |                                   |         |          |                      |                            |               |                 | X                     | X               |                                     |  |
| 20      | 11           | c.209+5G>A           | 3      | 18       | X            |               |                |                       |                          | X                     |                         |                                 |                                   | X       |          |                      |                            |               |                 |                       |                 |                                     |  |
| 21      | NA           | c.210-7_210-3delCTTT | 3      | NA       |              |               |                | X                     |                          | X                     |                         |                                 |                                   |         |          |                      |                            |               |                 |                       |                 |                                     |  |
| 23      | 55           | c.253+1G>A           | 4      | 23       |              |               |                |                       |                          | X                     |                         | X                               | X                                 | X       |          | X                    |                            | X             |                 | X                     | X               |                                     |  |
| 24      | 49           | c.253+1G>T           | 4      | 29       | X            | X             |                |                       |                          | X                     |                         | X                               |                                   |         |          | X                    |                            |               |                 |                       |                 |                                     |  |
| 25      | 4            | c.253+5G>T           | 4      | 8        | X            |               |                |                       |                          |                       |                         |                                 |                                   | X       |          |                      |                            |               |                 |                       |                 |                                     |  |

<sup>3</sup> The *PTEN* reference sequence is NC\_000010.11

|     |    |                         |     |    |   |   |   |   |   |   |  |   |   |   |   |   |   |   |   |   |   |   |
|-----|----|-------------------------|-----|----|---|---|---|---|---|---|--|---|---|---|---|---|---|---|---|---|---|---|
| 26  | 34 | c.253+5G>A              | 4   | 15 | X |   |   |   |   | X |  |   |   |   |   | X |   |   |   |   |   |   |
| 30  | 54 | c.493-2A>G              | 5   | 19 | X | X |   | X |   | X |  |   |   |   |   | X |   |   | X |   | X |   |
| 31  | 7  | c.492+1G>T              | 5   | 7  | X |   |   |   |   |   |  |   |   |   |   |   |   |   |   |   |   |   |
| 3   | 16 | c.80-3C>G<br>c.634+4A>T | 1&6 | 21 | X |   |   |   |   | X |  |   |   |   |   |   |   |   |   |   | X |   |
| 34  | 34 | c.634+2T>C              | 6   | 37 | X |   |   |   | X |   |  | X |   | X | X |   |   | X |   | X | X |   |
| 34a | 10 | c.634+2T>C              | 6   | 17 | X |   |   |   |   |   |  | X |   |   |   |   |   |   |   | X |   |   |
| 34b | NA | c.634+2T>C              | 6   | 7  | X |   |   |   |   |   |  |   |   | X |   |   |   |   |   |   |   |   |
| 35  | 25 | c.635-1G>C              | 6   | 27 | X |   |   |   |   | X |  | X |   | X |   |   |   |   |   | X |   |   |
| 36  | 45 | c.634+1G>C              | 6   | 27 | X | X |   |   |   |   |  |   | X | X |   | X |   |   |   |   | X |   |
| 37  | 45 | c.634+5G>C              | 6   | 68 | X |   | X |   | X | X |  | X |   | X | X |   |   |   | X |   | X |   |
| 38  | 55 | c.802-2A>T              | 7   | 44 | X |   |   |   |   |   |  | X |   | X |   | X |   | X |   |   | X |   |
| 39  | 27 | c.802-2A>G              | 7   | 38 | X |   |   |   |   | X |  | X |   | X |   |   |   |   |   | X | X |   |
| 46  | 35 | c.1026+1G>C             | 8   | 37 | X |   |   |   | X | X |  | X |   | X |   |   |   |   |   |   |   |   |
| 47  | 54 | c.1026+1G>C             | 8   | 33 | X |   |   |   |   | X |  | X |   | X |   | X |   |   | X |   | X |   |
| 48  | 21 | c.1026+1G>A             | 8   | 37 | X |   |   |   |   | X |  |   |   |   |   |   | X |   |   |   | X |   |
| 48a | 45 | c.1026+1G>A             | 8   | 20 | X | X |   |   |   | X |  |   |   | X |   | X |   |   |   |   | X |   |
| 48b | 66 | c.1026+1G>A             | 8   | 27 | X | X | X |   |   | X |  |   | X |   |   |   |   |   |   |   | X |   |
| 49  | 43 | c.1027-2A>C             | 8   | 25 | X |   |   | X |   | X |  |   | X | X |   | X |   | X |   |   | X |   |
| 1   | 50 | c.79+7A>G               | 1   | 11 |   | X | X |   |   |   |  |   |   |   |   | X |   |   |   |   |   |   |
| 2   | 60 | c.79+7A>G               | 1   | 2  |   |   |   |   |   |   |  |   | X |   |   | X |   |   |   |   |   |   |
| 3a  | 15 | c.80-3C>G               | 1   | NA |   |   |   |   |   |   |  |   |   |   |   |   |   |   |   |   |   | X |
| 3b  | 46 | c.80-3C>G               | 1   | NA | X |   |   |   |   |   |  |   |   |   |   |   |   |   |   |   |   |   |
| 8   | 60 | c.210-7_210-3delCTTT    | 3   | 15 | X | X |   |   |   | X |  |   |   | X |   |   |   |   |   |   |   |   |
| 9   | 29 | c.210-7_210-3delCTTT    | 3   | 14 |   |   |   |   |   |   |  |   |   | X |   | X |   |   |   |   | X |   |
| 9a  | 34 | c.210-7_210-3delCTTT    | 3   | 7  |   |   |   |   |   |   |  |   |   |   |   |   |   |   |   |   |   | X |
| 9b  | 69 | c.210-7_210-3delCTTT    | 3   | NA |   |   |   |   |   |   |  |   |   |   |   |   |   |   |   |   |   | X |
| 10a | 54 | c.210-7_210-3delCTTT    | 3   | NA |   | X |   |   |   |   |  |   | X |   |   |   |   |   |   |   |   |   |

|    |    |                         |   |    |   |   |   |  |   |  |   |   |   |   |   |   |  |   |   |   |
|----|----|-------------------------|---|----|---|---|---|--|---|--|---|---|---|---|---|---|--|---|---|---|
| 11 | 47 | c.210-7_210-3delCTTTT   | 3 | 0  |   |   |   |  |   |  |   |   |   |   |   |   |  |   |   | X |
| 12 | NA | c.210-7_210-3delCTTTT   | 3 | NA | X |   |   |  |   |  |   |   |   |   |   |   |  |   |   |   |
| 13 | 59 | c.210-7_210-3delCTTTT   | 3 | 10 | X |   |   |  | X |  |   |   |   |   |   |   |  |   |   |   |
| 14 | 55 | c.210-7_210-3delCTTTT   | 3 | 7  | X | X |   |  |   |  |   | X |   |   |   |   |  |   |   |   |
| 10 | 50 | c.210-7_210-3delCTTTT   | 3 | 17 | X |   | X |  |   |  |   |   | X |   | X |   |  |   |   |   |
| 15 | 49 | c.210-4_210-1delTTAG    | 3 | 42 | X | X |   |  | X |  | X |   |   |   | X |   |  | X | X | X |
| 16 | 71 | c.210-9T>C              | 3 | NA |   | X |   |  |   |  |   |   |   |   |   |   |  |   |   |   |
| 17 | 50 | c.210-39A>G             | 3 | 3  |   | X |   |  |   |  |   | X | X | X | X |   |  |   |   |   |
| 18 | 40 | c.210-39A>G             | 3 | 6  |   |   | X |  |   |  |   | X |   |   | X |   |  |   |   |   |
| 22 | NA | c.210-8delT             | 3 | NA |   | X |   |  |   |  |   |   |   |   |   |   |  |   |   |   |
| 27 | 36 | c.254-51A>T,c.254-72A>T | 4 | 15 | X | X |   |  |   |  |   | X |   |   |   |   |  |   |   |   |
| 28 | 59 | c.254-38dupT            | 4 | 2  |   |   | X |  |   |  |   |   | X |   |   | X |  |   |   |   |
| 29 | 37 | c.254-38dupT            | 4 | NA |   | X | X |  | X |  |   |   |   |   |   |   |  |   |   |   |
| 32 | 8  | c.493-31A>G             | 5 | 17 |   |   |   |  |   |  |   | X |   |   |   |   |  |   |   |   |
| 33 | 47 | c.493-52A>G             | 5 | NA |   | X |   |  |   |  |   |   |   |   |   |   |  |   |   |   |
| 40 | 56 | c.802-51_802-14del38    | 7 | NA |   | X |   |  |   |  |   |   |   |   |   |   |  |   |   |   |
| 41 | 54 | c.802-51_802-14del38    | 7 | NA |   | X |   |  |   |  |   |   |   |   | X |   |  |   |   |   |
| 42 | 58 | c.802-51_802-14del38    | 7 | NA |   | X |   |  |   |  |   |   |   |   |   |   |  |   |   |   |
| 43 | 48 | c.802-51_802-14del38    | 7 | 0  |   |   |   |  |   |  | X |   |   |   |   |   |  |   |   |   |
| 44 | 50 | c.802-51_802-14del38    | 7 | 2  |   | X |   |  |   |  |   |   |   |   |   |   |  |   |   |   |
| 45 | 38 | c.802-51_802-14del38    | 7 | 6  |   |   |   |  | X |  |   | X | X |   |   |   |  |   |   |   |

Nucleotide numbering uses +1 as the A of ATG translation initiation codon in the reference sequence, with the initiation codon as codon 1. Probands are denoted by a unique patient number. Family members are denoted by a combination of the proband's unique patient number and a lowercase letter.

Supplemental Table 2. List of primers used in the study

| Name              | Sequence                                  |
|-------------------|-------------------------------------------|
| 969F(5'UTR)       | CATTTCCATCCTGCAGAAGAAG                    |
| 2777R             | GGTCCAGAGTCCAGCATAAA                      |
| 1438F(E5)AS       | GGGACGAACTGGTGTAAATGATATG                 |
| 2281(3'UTR)       | AGGTCCATTTTCAGTTTATTCAAGTTTA              |
| 969F(5'UTR)       | CATTTCCATCCTGCAGAAGAAG                    |
| 1402-1422R(E5)    | TCGTCCCTTTCCAGCTTTAC                      |
| 1736F(E7)         | GGACCCACACGACGGGAA                        |
| 2309-2281R(3'UTR) | AGGTCCATTTTCAGTTTATTCAAGTTTA              |
| E7F-(1704)        | GCCAGCTAAAGGTGAAGATA                      |
| IVS8R+50          | CACACATCACATACATAACAAGTC                  |
| E7F-1752          | CGACGGGAAGACAAGTTCATGTAC                  |
| IVS8R+183         | TGACGCTGTGTACATTGGGTATTT                  |
| PTEN 3'RACE-GSP   | GATTACCCAAGCTTGGACCCACACGACGGGAAGACAAGTTC |



**Supplemental Table 3.**

Germline *PTEN*<sup>4</sup> exonic mutations and clinical features from 24 probands and family members.

| Patient | Age of Onset | Variation Name                       | Exon | CC Score | Macrocephaly | Breast cancer | Thyroid cancer | Endometrial carcinoma | Lhermitte-Duclos disease | Other thyroid lesions | Intellectual disability | Hamartomatous intestinal polyps | Fibrocystic disease of the breast | Lipomas | Fibromas | Genitourinary tumors | Genitourinary malformation | Trichilemmoma | Acral keratoses | Papillomatous lesions | Mucosal lesions | Negative for phenotypes of interest |  |
|---------|--------------|--------------------------------------|------|----------|--------------|---------------|----------------|-----------------------|--------------------------|-----------------------|-------------------------|---------------------------------|-----------------------------------|---------|----------|----------------------|----------------------------|---------------|-----------------|-----------------------|-----------------|-------------------------------------|--|
| 101     | 35           | c.264T>A (p.Tyr88*)                  | 5    | 35       | X            | X             |                |                       |                          | X                     |                         | X                               | X                                 |         |          |                      |                            |               |                 |                       |                 |                                     |  |
| 102     | 40           | c.264T>G (p.Tyr88*)                  | 5    | 51       | X            |               | X              |                       | X                        | X                     |                         | X                               |                                   |         |          | X                    |                            |               |                 |                       |                 | X                                   |  |
| 103     | 62           | c.386G>A (p.Gly129Glu)               | 5    | 37       | X            |               |                |                       |                          | X                     |                         |                                 | X                                 | X       |          |                      |                            |               |                 |                       |                 |                                     |  |
| 104     | 42           | c.388C>G (p.Arg130Gly)               | 5    | 16       | X            | X             |                |                       |                          | X                     |                         |                                 | X                                 | X       |          | X                    |                            |               | X               | X                     |                 |                                     |  |
| 105     | 61           | c.388C>T (p.Arg130*)                 | 5    | 38       | X            |               |                | X                     |                          | X                     |                         | X                               |                                   |         | X        | X                    | X                          | X             |                 | X                     | X               |                                     |  |
| 106     | 57           | c.388C>T (p.Arg130*)                 | 5    | 13       | X            | X             | X              |                       |                          |                       |                         |                                 |                                   |         |          |                      |                            |               |                 |                       |                 |                                     |  |
| 107     | 72           | c.389G>A (p.Arg130Gln)               | 5    | 18       | X            | X             |                |                       |                          | X                     |                         |                                 |                                   |         |          | X                    |                            | X             |                 | X                     |                 |                                     |  |
| 108     | 46           | c.389G>A (p.Arg130Gln)               | 5    | 43       | X            | X             |                |                       |                          | X                     |                         | X                               | X                                 |         |          | X                    |                            |               | X               |                       |                 |                                     |  |
| 109     | 39           | c.389G>A (p.Arg130Gln)               | 5    | 37       | X            | X             |                |                       |                          | X                     |                         |                                 | X                                 |         |          | X                    |                            | X             | X               | X                     | X               |                                     |  |
| 110     | 68           | c.406T>C (p.Cys136Arg)               | 5    | 69       | X            |               |                | X                     |                          | X                     |                         | X                               | X                                 | X       | X        |                      |                            | X             | X               | X                     | X               |                                     |  |
| 111     | 52           | c.406T>C (p.Cys136Arg)               | 5    | 18       |              | X             | X              | X                     |                          | X                     |                         |                                 | X                                 | X       |          |                      |                            |               |                 |                       |                 |                                     |  |
| 112     | 46           | c.406T>C (p.Cys136Arg)               | 5    | 18       | X            | X             |                |                       |                          | X                     |                         |                                 | X                                 |         |          |                      |                            |               |                 |                       |                 | X                                   |  |
| 113     | 37           | c.406T>C (p.Cys136Arg)               | 5    | 20       | X            |               |                |                       |                          | X                     |                         |                                 |                                   |         |          |                      |                            |               |                 |                       |                 |                                     |  |
| 114     | NA           | c.407_423del17<br>(p.Cys136Serfs*38) | 5    | 14       |              | X             |                |                       |                          |                       |                         | X                               |                                   |         |          |                      |                            |               |                 |                       |                 |                                     |  |
| 115     | 43           | c.407G>A (p.Cys136Tyr)               | 5    | 37       | X            |               |                |                       |                          | X                     |                         | X                               | X                                 |         |          | X                    |                            |               |                 | X                     | X               |                                     |  |
| 116     | 6            | c.420_421insA<br>(p.His141Thrfs*39)  | 5    | 13       | X            |               |                |                       |                          |                       |                         |                                 |                                   |         |          |                      |                            |               |                 |                       |                 |                                     |  |

<sup>4</sup> The *PTEN* reference sequence is NC\_000010.11

|          |    |                                          |   |    |   |   |   |   |   |   |   |   |  |   |   |  |  |  |  |   |   |
|----------|----|------------------------------------------|---|----|---|---|---|---|---|---|---|---|--|---|---|--|--|--|--|---|---|
| 117      | 52 | c.422A>G (p.His141Arg)                   | 5 | 17 | X |   |   | X |   |   |   |   |  |   | X |  |  |  |  |   |   |
| 118      | 39 | c.463T>A (p.Tyr155Asn)                   | 5 | 28 | X |   |   |   | X |   |   |   |  |   | X |  |  |  |  |   | X |
| 118<br>a | 12 | c.463T>A (p.Tyr155Asn)                   | 5 | 19 | X |   |   |   |   |   |   |   |  |   |   |  |  |  |  |   | X |
| 119      | 30 | c.562T>C (p.Tyr188His)                   | 6 | 10 | X |   |   |   |   |   |   |   |  |   |   |  |  |  |  |   |   |
| 119<br>a | 4  | c.562T>C (p.Tyr188His)                   | 6 | 7  | X |   |   |   |   |   |   |   |  |   |   |  |  |  |  |   |   |
| 120      | 31 | c.609_611delTCCinsATAAA<br>T (p.Pro204*) | 6 | 41 | X |   | X |   | X |   | X | X |  | X |   |  |  |  |  |   |   |
| 121      | 60 | c.613A>G (p.Met205Val)                   | 6 | 12 | X | X |   |   |   |   |   |   |  |   | X |  |  |  |  |   |   |
| 122      | 24 | c.632delG (p.Cys211fs)                   | 6 | 37 | X |   |   |   | X | X | X |   |  |   |   |  |  |  |  | X | X |

Nucleotide numbering uses +1 as the A of ATG translation initiation codon in the reference sequence, with the initiation codon as codon 1. Proband's are denoted by a unique number. Family members are denoted by a combination of the proband's unique patient number and a lowercase letter.
